# Supplementary material for: The Survival Effect of Radiotherapy on Stage II/III Rectal Cancer in Different Age Groups: Formulating Radiotherapy Decision-Making Based on Age
Source: PubMed Central journal article supplement (PMC8356670; doi:10.3389/fonc.2021.695640), 2021-07-28
Supplement: Image_1.pdf [file Image_1.pdf]

| Subgroup                       | HR (95%CI)         | p-value |
|--------------------------------|--------------------|---------|
| <b>Early-onset stage II RC</b> |                    |         |
| RT vs. Non-RT                  | 1.083(0.788-1.490) | 0.622   |
| nRT vs. Non-RT                 | 0.995(0.740-1.339) | 0.974   |
| <b>Middle-aged stage II RC</b> |                    |         |
| RT vs. Non-RT                  | 0.962(0.808-1.144) | 0.660   |
| nRT vs. Non-RT                 | 0.986(0.839-1.160) | 0.869   |
| <b>Elderly stage II RC</b>     |                    |         |
| RT vs. Non-RT                  | 0.891(0.794-1.000) | 0.050   |
| nRT vs. Non-RT                 | 0.833(0.742-0.935) | 0.002   |

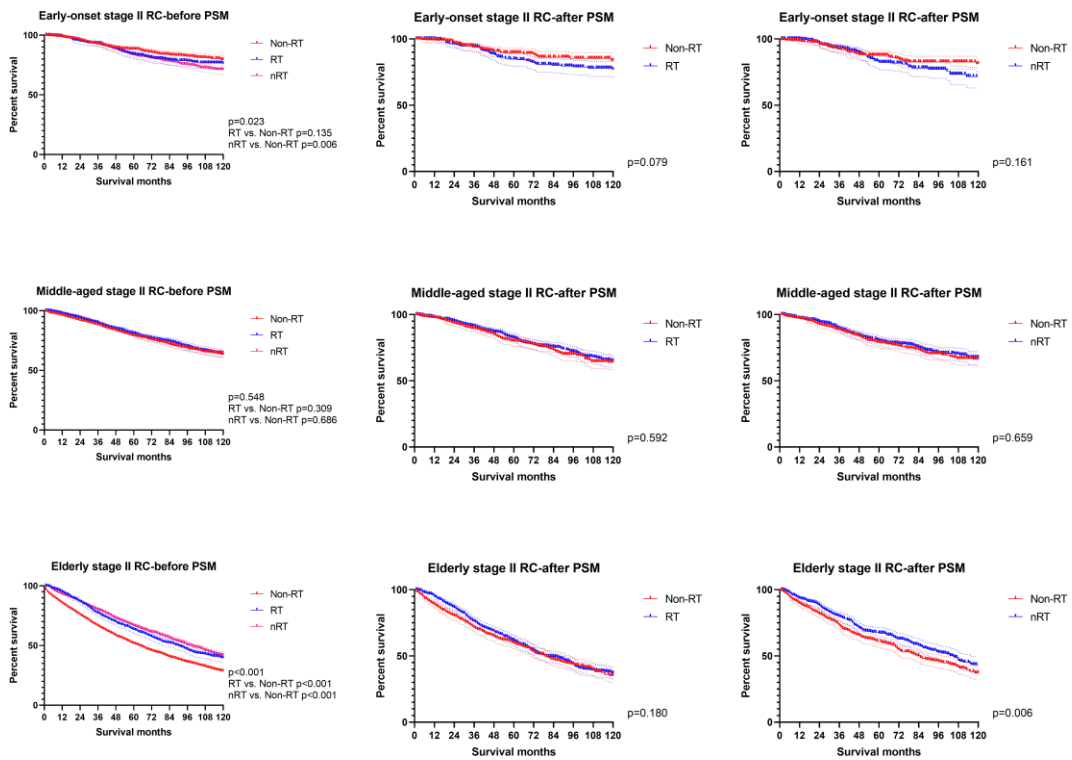

**We took out the Stage II RC patients separately for analysis and got similar results comparing to the total stage II/III RC patients.**

| Subgroup                                   | HR (95%CI)         | p-value |
|--------------------------------------------|--------------------|---------|
| Elderly stage II/III RC with RNE $\geq 12$ |                    |         |
| RT vs. Non-RT                              | 0.974(0.897-1.058) | 0.535   |
| nRT vs. Non-RT                             | 0.906(0.832-0.987) | 0.023   |

Elderly stage II/III RC with RNE $\geq 12$ -before PSM

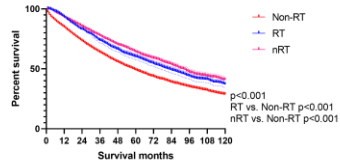

Elderly stage II/III RC with RNE $\geq 12$ -after PSM

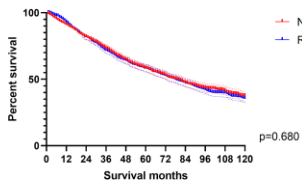

Elderly stage II/III RC with RNE $\geq 12$ -after PSM

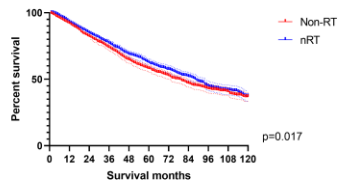

**These elderly stage II/III RC patients with RNE $\geq 12$  can get survival benefit from nRT but not RT.**

| Subgroup                                  | HR (95%CI)         | p-value |
|-------------------------------------------|--------------------|---------|
| Early-onset stage II/III RC with RNE < 12 |                    |         |
| RT vs. Non-RT                             | 1.169(0.881-1.552) | 0.279   |
| nRT vs. Non-RT                            | 0.926(0.718-1.194) | 0.553   |
| Middle-aged stage II/III RC with RNE < 12 |                    |         |
| RT vs. Non-RT                             | 1.021(0.874-1.193) | 0.794   |
| nRT vs. Non-RT                            | 0.935(0.814-1.075) | 0.347   |

Early-onset stage II/III RC with RNE <12-before PSM

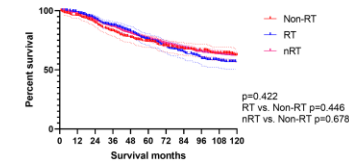

Early-onset stage II/III RC with RNE <12-after PSM

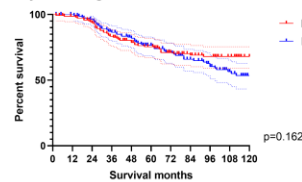

Early-onset stage II/III RC with RNE <12-after PSM

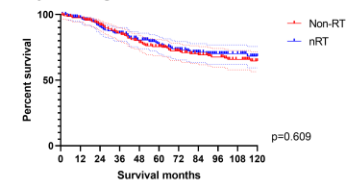

Middle-aged stage II/III RC with RNE <12-before PSM

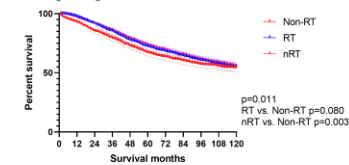

Middle-aged stage II/III RC with RNE <12-after PSM

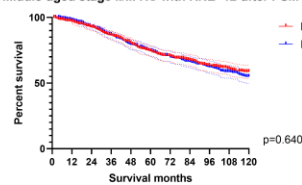

Middle-aged stage II/III RC with RNE <12-after PSM

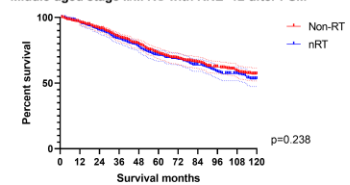

**Early-onset and middle-aged stage II/III RC patients with RNE < 12 cannot obtain survival benefit from radiotherapy, including nRT and postoperative RT.**
